# Supplementary material for: Size-exclusion chromatography-based extracellular vesicle size subtyping and multiplex membrane protein profiling for differentiating gastrointestinal cancer prognosis
Source: Royal Society of Chemistry journal article supplement (doi:10.1039/d3an01027a), 2023-01-01
Supplement: d3an01027a1.pdf [file d3an01027a1.pdf]

Supplementary Material for:

**Size-Exclusion Chromatography-Based Exosome Size  
Subtyping and Multiplex Membrane Protein Profiling for  
Differentiating Gastrointestinal Cancer Prognosis**

Ti Qin<sup>a,b</sup>, Pinhao Li<sup>e</sup>, Jun Li<sup>f</sup>, Qianqian Guo<sup>a,b</sup>, Ying Chen<sup>a,b</sup>, Yu-E Wang<sup>a,b</sup>, Ling Tao<sup>a,b</sup>,  
Jian Huang<sup>c,d,\*</sup>, Xiangchun Shen<sup>a,b,\*</sup> and Xingjie Wu<sup>a,b,\*</sup>

<sup>a</sup>*State Key Laboratory of Functions and Applications of Medicinal Plants, School of Pharmaceutical Sciences, Guizhou Medical University, University Town, Guiyan New District, 550025, Guizhou, China*

<sup>b</sup>*The High Efficacy Application of Natural Medicinal Resources Engineering Center of Guizhou Province, School of Pharmaceutical Sciences, Guizhou Medical University, University Town, Guiyan New District, 550025, Guizhou, China*

<sup>c</sup>*Center for Clinical Laboratories, The Affiliated Hospital of Guizhou Medical University, Guiyang, 550004, Guizhou, China*

<sup>d</sup>*School of Clinical Laboratory Science, Guizhou Medical University, University Town, Guiyan New District, 550025, Guizhou, China*

<sup>e</sup>*Department of Pathology, The Affiliate hospital of Guizhou Medical University, Guiyang, 550004, Guizhou, China*

<sup>f</sup>*Hongkong Well Hope Group Limited, 6/F RFCM, Manulife Place.348 Kwun Tong Road, Kowloon, 999077, Hong Kong, China*

\* Corresponding author

Jian Huang (huangjian810309@gmc.edu.cn)

Xiangchun Shen (shenxiangchun@126.com)

Xingjie Wu (wxj\_gmu@126.com)

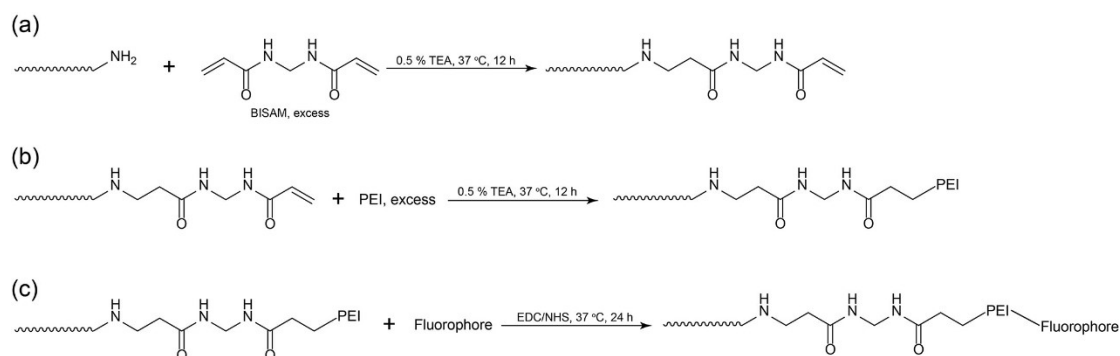

Fig. S1. (a) Aptamer sequence with primary amine at 5' end was first reacted with excess BISAM for 12 h to prepare acrylated aptamer. (b) Acrylated aptamer was further reacted with excess PEI for introducing multiple amine groups for. (c) PEI aptamer was finally reacted with fluorophores through EDC/NHS catalyzed amidation to produce fluorescent aptamer.

Table S1. Aptamer sequences used for protein profiling

| Name          | Sequences (5' to 3')                                                                    |
|---------------|-----------------------------------------------------------------------------------------|
| CD63 aptamer  | NH <sub>2</sub> -CAC CCC ACC TCG CTC CCG TGA CAC TAA TGC TA [1]                         |
| CD24 aptamer  | NH <sub>2</sub> -TAT GTG GGT GGG TGG GCG GTT ATG CTG ATG CAG CCT TGC T<br>[2]           |
| EpCAM aptamer | NH <sub>2</sub> -CAC TAC AGA GGT TGC GTC TGT CCC ACG TTG TCA TGG GGG<br>GTT GGC CTG [3] |
| MUC1 aptamer  | NH <sub>2</sub> -GCA GTT GAT CCT TTG GAT ACC CTG G [4]                                  |

## References

- 1 Y. Jiang, M. Shi, Y. Liu, S. Wan, C. Cui, L. Zhang and W. Tan, *Angew. Chem. Int. Ed.*, 2017, **56**, 11916–11920.
- 2 L. Hou, L. Pu, Y. Chen, Y. Bai, Y. Zhou, M. Chen, S. Wang, Yi-pin Lv, C. Ma, P. Cheng, K. Zhang, Q. Liang, S. Deng and D. Wang, *ACS Nano*, 2022, **16**, 5807–5819.
- 3 X. Xie, F. Li, H. Zhang, Y. Lu, S. Lian, H. Lin, Y. Gao and L. Jia, *Eur J Pharm Sci*, 2016, **83**, 28–35.
- 4 B. S. Varnamkhasti, H. Hosseinzadeh, M. Azhdarzadeh, S. Y. Vafaei, M. Esfand yari-Manesh, Z. H. Mirzaie, M. Amini, S. N. Ostad, F. Atyabi and R. Dinarvand, *Int J Pharm*, 2015, **494**, 430–444.
